# Supplementary material for: One-step coating of Ni–Fe alloy outerwear on 1–3-dimensional nanomaterials by a novel technology
Source: Royal Society of Chemistry journal article supplement (doi:10.1039/d0nj05292b), 2021-01-01
Supplement: d0nj05292b1.pdf [file d0nj05292b1.pdf]

# One step coating of Ni – Fe alloy outerwear around 1-3 dimensional nano materials by novel technology

Yang Liu\*, Shiqing Lu, Haidong Yang\*

College of Chemistry and Chemical Engineering, Northwest Normal University, Lanzhou , Gansu,  
730070, P.R. China.

\*E-mail: [liuyang2897@163.com](mailto:liuyang2897@163.com) (Yang Liu), [yanghaidong2017@163.com](mailto:yanghaidong2017@163.com) (Haidong Yang);

Tel: +86-15293122897

## The detailed of electrodeposition

An electrochemical cell with a two-electrode configuration was used for the experiments. A copper plate (30 mm×30 mm×1 mm) was used as the anode and another copper plate (10mm×10mm×1mm) used as cathode.

## Nickel iron plating formula

Nickel (II) sulfate hexahydrate 100 g/l  
Iron (II) sulfate heptahydrate 10 g/l  
Boric acid 40 g/l  
Sodium chloride 25 g/l  
Saccharin 2 g/l  
Sodium citrate 14.7 g/l  
Ascorbic acid 0.5 g/l  
2-Butyne-1,4-diol 0.6 g/l  
Sodium dodecylbenzenesulphonate 0.05 g/l

**Table S1** Plating conditions

|                 |                     |
|-----------------|---------------------|
| Temperature     | 60 °C               |
| pH              | 4.2                 |
| Plating time    | 600 s               |
| Current density | 6 A/dm <sup>2</sup> |

## Characterization

The morphologies of Ni-Fe alloy@1-3 dimensional core-shell nano materials were observed using a TECNAI G<sup>2</sup>Tf<sup>20</sup> transmission electron microscope, TEM (FEI American). All samples for TEM characterization were prepared on copper wire mesh. The X-ray diffraction (XRD) measurements were performed on a Rigaku D/max-2400 diffractometer, using Cu-K $\alpha$  radiation as the X-ray source in the range of 20–80°. Hysteresis loop measurement was used to characterize the magnetism of Ni-Fe alloy@1-3 dimensional core-shell nano materias. The content of Ni-Fe alloy@1-3 dimensional core-shell nano materials was analyzed by inductively coupled plasma (ICP) spectroscopy using an IRIS Advantage analyzer. X-ray photoelectron spectroscopy (XPS) was recorded on using an Kratos AXIS Ultra DLD instruments with a monochromatic X-ray source (Al K $\alpha$   $h\nu = 1486.6$  eV) and all the peaks were calibrated by the standard position of C 1s peak.

## Preparation of working electrode

The glassy carbon electrode (GCE, 3.0 mm in diameter, Wuhan Gaoss Union Technology Co., Ltd.) was polished mechanically with Al<sub>2</sub>O<sub>3</sub> powder (Aldrich, 0.05  $\mu$ m) and then cleaned with ethanol and deionized water. The catalyst ink was formed with 1 mg catalysts dispersed in 1 mL water-ethanol-Nafion (volume ratio = 2 : 1 : 1, Nafion : 0.5 wt%) solution, followed by sonication for at least 30 min. Then, 10  $\mu$ L of well-dispersed catalyst ink (containing 0.01 mg of catalyst) was loaded onto the GCE and dried 10 min under an infrared light to form the working electrode with a loading of 0.143 mg cm<sup>-2</sup>.

## C<sub>dl</sub> measurement

The double-layer capacitance (C<sub>dl</sub>) measurement of Ni-Fe alloy@1-3 dimensional core-shell nano materials was operated by cyclic voltammetry (CV) in 0.1 M KOH solution at room temperature with a typical three-electrode system as above. The cyclic voltammetry (CV) was performed in a non-faradaic region (-0.05–0.05 V vs. Hg/HgO) at different scan rates (2–10 mV s<sup>-1</sup>). The data of C<sub>dl</sub> was equated by the linear slope of the one-half of the difference in current density at 0 V vs. Hg/HgO plotted against scan rate. The current density was normalized to the geometrical surface area of the GCE (0.07 cm<sup>2</sup>).

**Table S2** The concentration of Nickel (II) and Iron (II) in plating solutions during polarization curve measurement

| The concentration of Nickel (II) and Iron (II) in plating solutions |         |                   |        | Mass percent |
|---------------------------------------------------------------------|---------|-------------------|--------|--------------|
| Nickel (II) sulfate                                                 | 100 g/l | Iron (II) sulfate | 10 g/l | 100 wt%      |
| Nickel (II) sulfate                                                 | 90 g/l  | Iron (II) sulfate | 9 g/l  | 90 wt%       |
| Nickel (II) sulfate                                                 | 80 g/l  | Iron (II) sulfate | 8 g/l  | 80 wt%       |
| Nickel (II) sulfate                                                 | 70 g/l  | Iron (II) sulfate | 7 g/l  | 70 wt%       |
| Nickel (II) sulfate                                                 | 60 g/l  | Iron (II) sulfate | 6 g/l  | 60 wt%       |

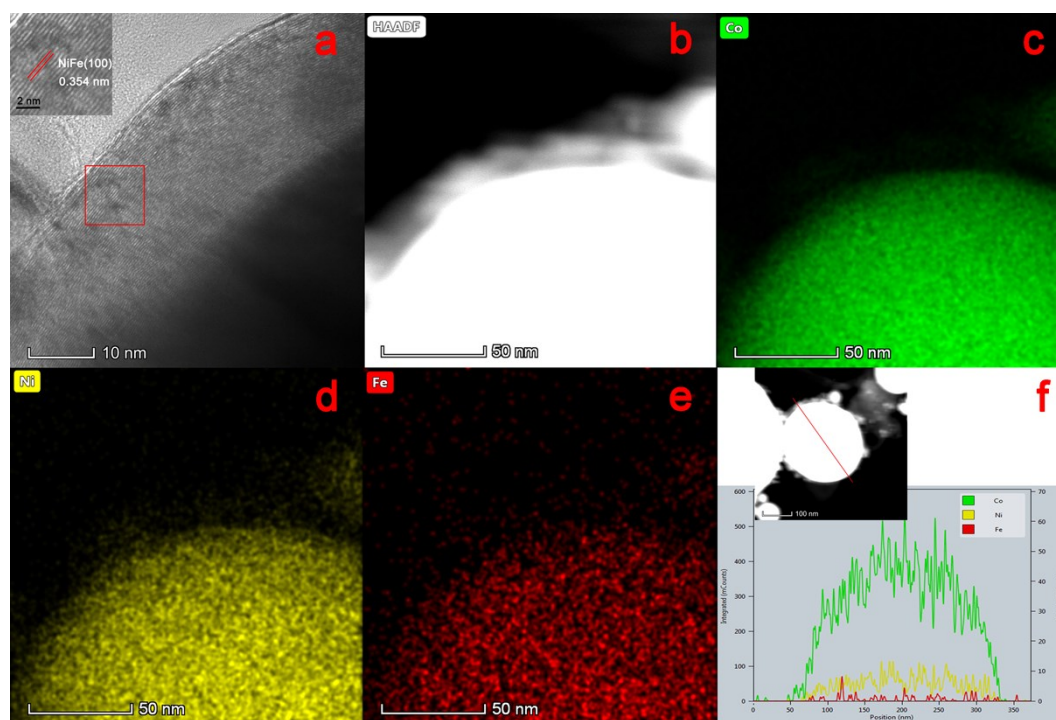

**Figure S1** (a) HRTEM images of Ni-Fe alloy@Co NPs; (b) HAADF-STEM image of Ni-Fe alloy@Co NPs and the corresponding HAADF-STEM-EDX elemental mapping images of (c) Co, (d) Ni, and (e) Fe; (f) Cross-sectional compositional line profiles of Co, Ni and Fe in Ni-Fe alloy@Co NPs recorded along the line shown in the HAADF-STEM image (inset).

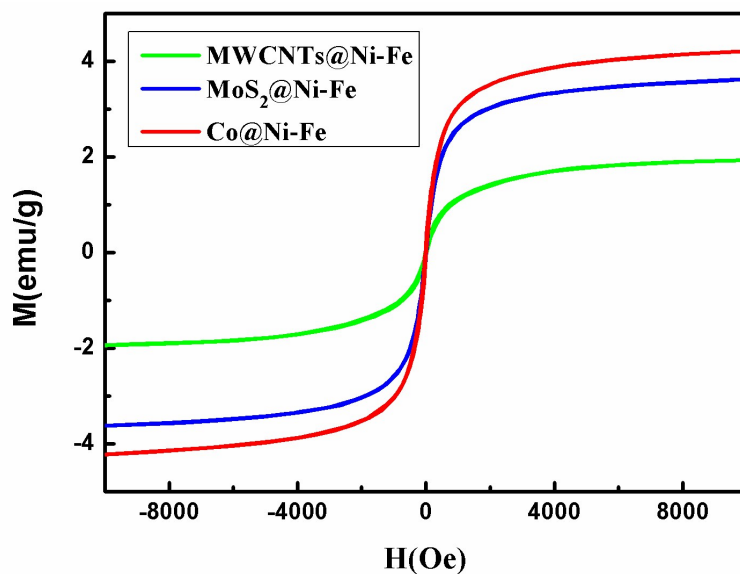

**Figure S2** Hysteresis loop curves of Ni-Fe alloy@MWCNTs, Ni-Fe alloy@graphene-like MoS<sub>2</sub>, and Ni-Fe alloy@Co NPs.

**Table S3** The compositions of the Ni-Fe alloy catalysts derived from inductively coupled plasma spectra (ICP)

| The concentration of Nickel (II) sulfate (g/L) | The quality of Iron (II) sulfate (g/L) | The compositions of the most active catalysts |
|------------------------------------------------|----------------------------------------|-----------------------------------------------|
| 100                                            | 2                                      | Ni <sub>95.2</sub> Fe <sub>4.8</sub>          |
| 100                                            | 4                                      | Ni <sub>92.9</sub> Fe <sub>7.1</sub>          |
| 100                                            | 6                                      | Ni <sub>91.7</sub> Fe <sub>8.3</sub>          |
| 100                                            | 8                                      | Ni <sub>90.2</sub> Fe <sub>9.8</sub>          |
| 100                                            | 10                                     | Ni <sub>85.5</sub> Fe <sub>14.5</sub>         |
| 100                                            | 12                                     | Ni <sub>80.1</sub> Fe <sub>19.9</sub>         |
| 100                                            | 14                                     | Ni <sub>73.9</sub> Fe <sub>26.1</sub>         |
| 100                                            | 16                                     | Ni <sub>71.1</sub> Fe <sub>28.9</sub>         |

**Table S4** The results of current efficiency measurement

| Electrodeposition time | The weight of Ni-Fe alloy<br>(theoretical value) (mg) | The weight of Ni-Fe alloy<br>(actual value) (mg) | Current efficiency |
|------------------------|-------------------------------------------------------|--------------------------------------------------|--------------------|
| 0-120s                 | 4.39                                                  | 1.39                                             | 31.66%             |
| 120-240s               | 4.39                                                  | 1.21                                             | 27.56%             |
| 240-360s               | 4.39                                                  | 1.13                                             | 25.74%             |
| 360-480s               | 4.39                                                  | 1.08                                             | 24.60%             |
| 480-600s               | 4.39                                                  | 0.95                                             | 21.64%             |

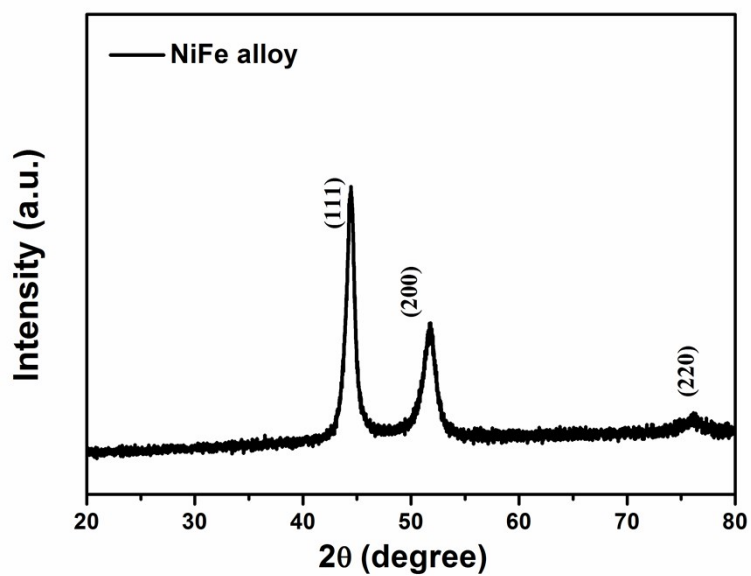

**Figure S3** XRD pattern of the reference Ni-Fe alloy catalyst.

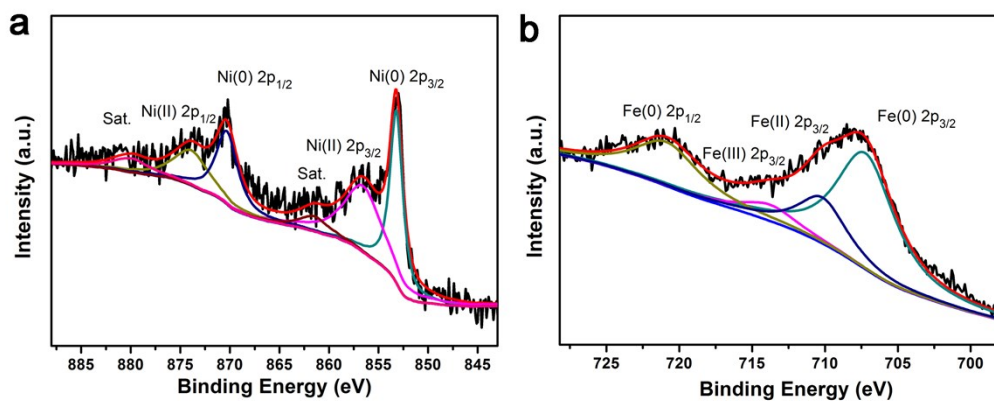

**Figure S4** Deconvoluted high-resolution spectra of (a) Ni 2p and (b) Fe 2p of the reference Ni-Fe alloy catalyst.

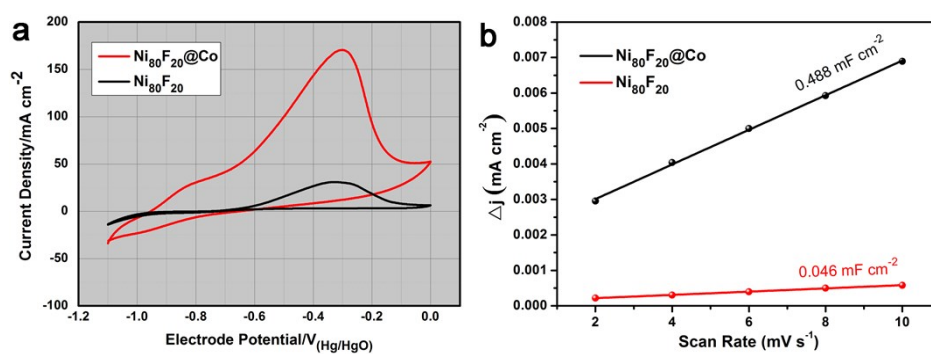

**Figure S5** (a) Cyclic voltammetric measurements for hydrazine electrooxidation and (b)  $C_{dl}$  measurements of reference Ni-Fe alloy catalyst and  $Ni_{80}Fe_{20}@Co$  NPs.
